# Supplementary material for: Development of a human neuromuscular tissue-on-a-chip model on a 24-well-plate-format compartmentalized microfluidic device
Source: Royal Society of Chemistry journal article supplement (doi:10.1039/d1lc00048a), 2021-01-01
Supplement: d1lc00048a2.pdf [file d1lc00048a2.pdf]

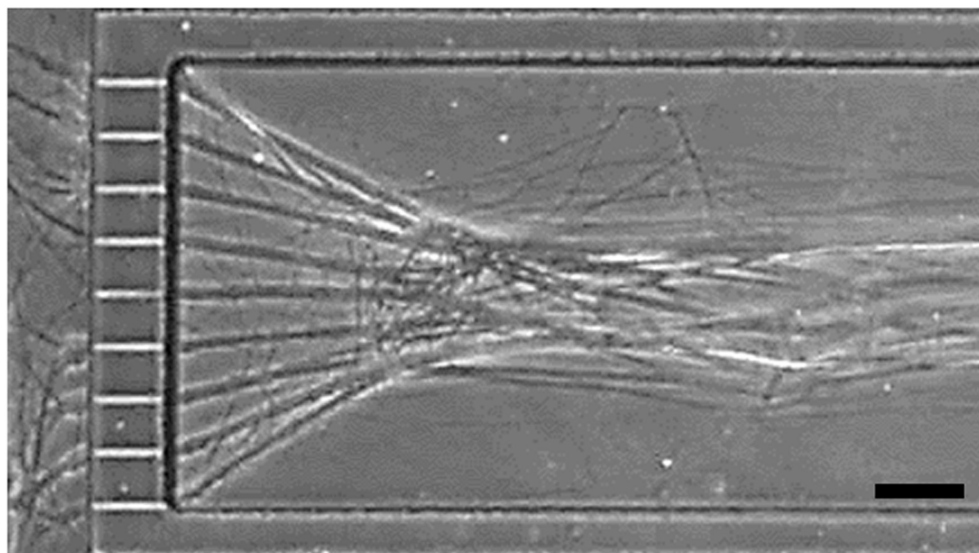

Supplementary Fig. 2 Axon elongation in the MN chamber with one step nine microtunnels for axons. Scale bar: 100  $\mu\text{m}$ .
