# Supplementary material for: Development of a human neuromuscular tissue-on-a-chip model on a 24-well-plate-format compartmentalized microfluidic device
Source: Royal Society of Chemistry journal article supplement (doi:10.1039/d1lc00048a), 2021-01-01
Supplement: d1lc00048a3.pdf [file d1lc00048a3.pdf]

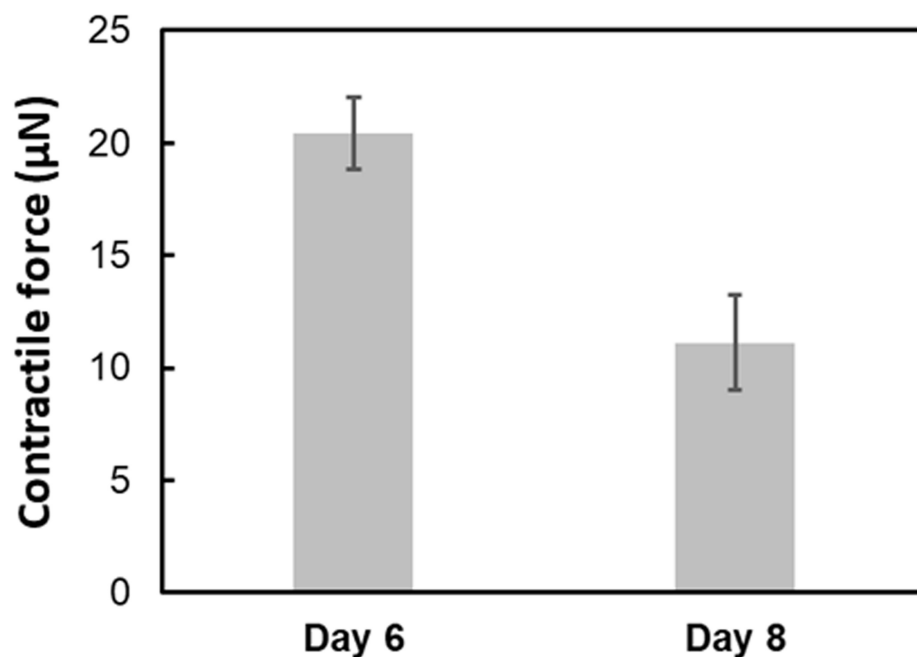

Supplementary Fig.3 EPS-induced contractile force of cocultured SkM tissues on day 6 and 8. EPS (30 Hz, 2 ms, 5 V/mm) was applied to the SkM chamber. The displacement of the micropost during the EPS was measured and the contractile force was calculated.
