# Supplementary figures and images for: Development of a human neuromuscular tissue-on-a-chip model on a 24-well-plate-format compartmentalized microfluidic device
Source: Royal Society of Chemistry journal article supplement (doi:10.1039/d1lc00048a), 2021-01-01

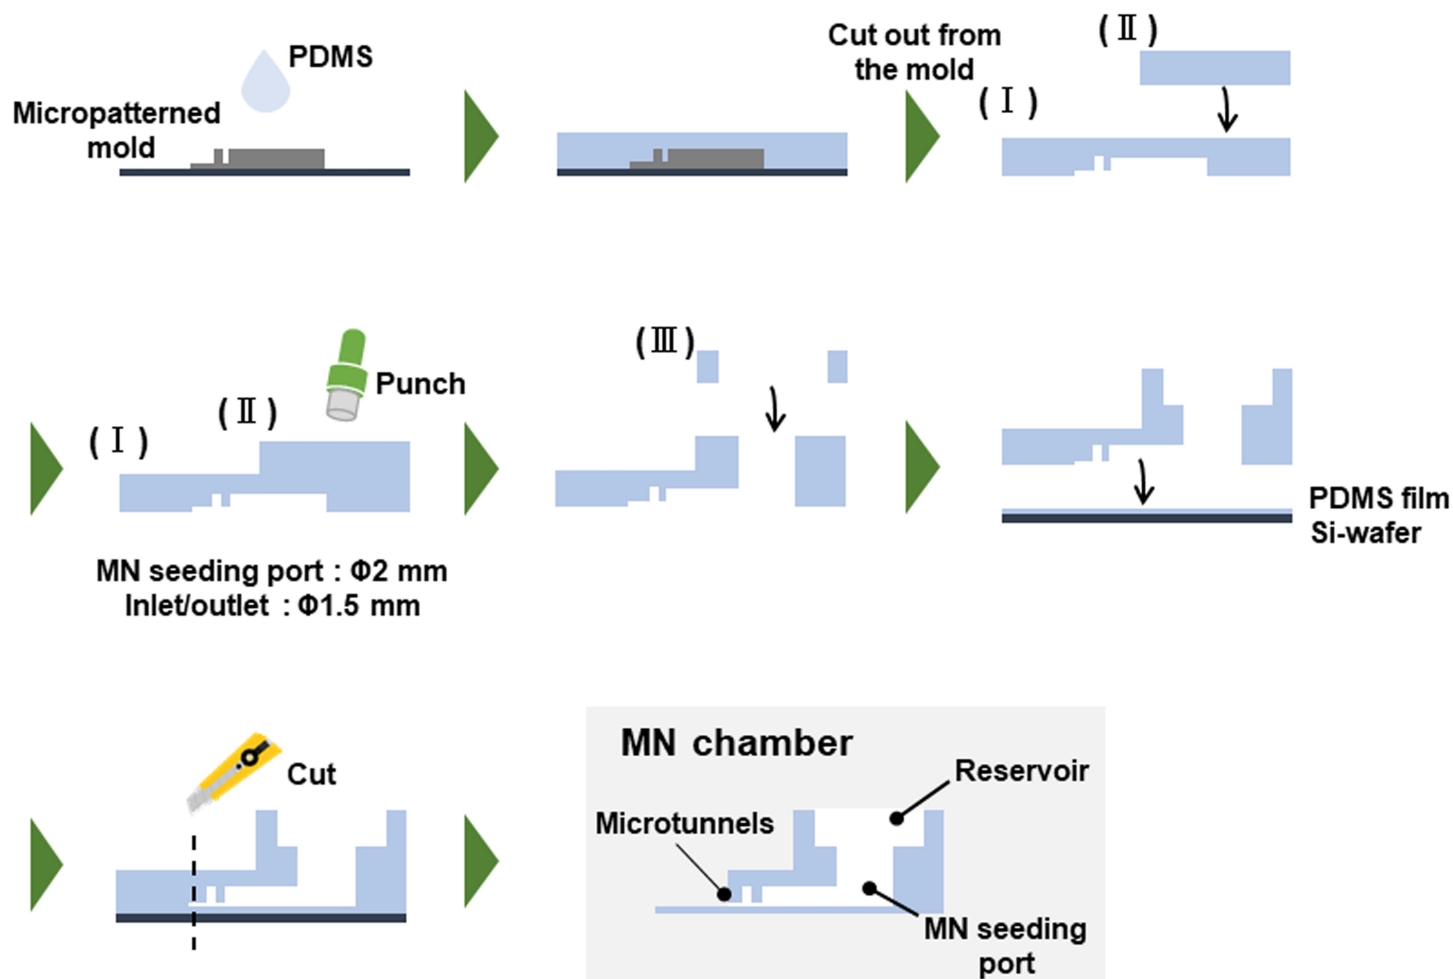

Supplementary Fig. 1 Fabrication process for the microdevice

Supplement: d1lc00048a1.pdf [file d1lc00048a1.pdf]
